# Supplementary material for: A Comparative Study of the T Cell Stimulatory and Polarizing Capacity of Human Primary Blood Dendritic Cell Subsets
Source: PubMed Central journal article supplement (PMC4761397; doi:10.1155/2016/3605643), 2016-02-07
Supplement: 3605643.f1.pdf [file 3605643.f1.pdf]

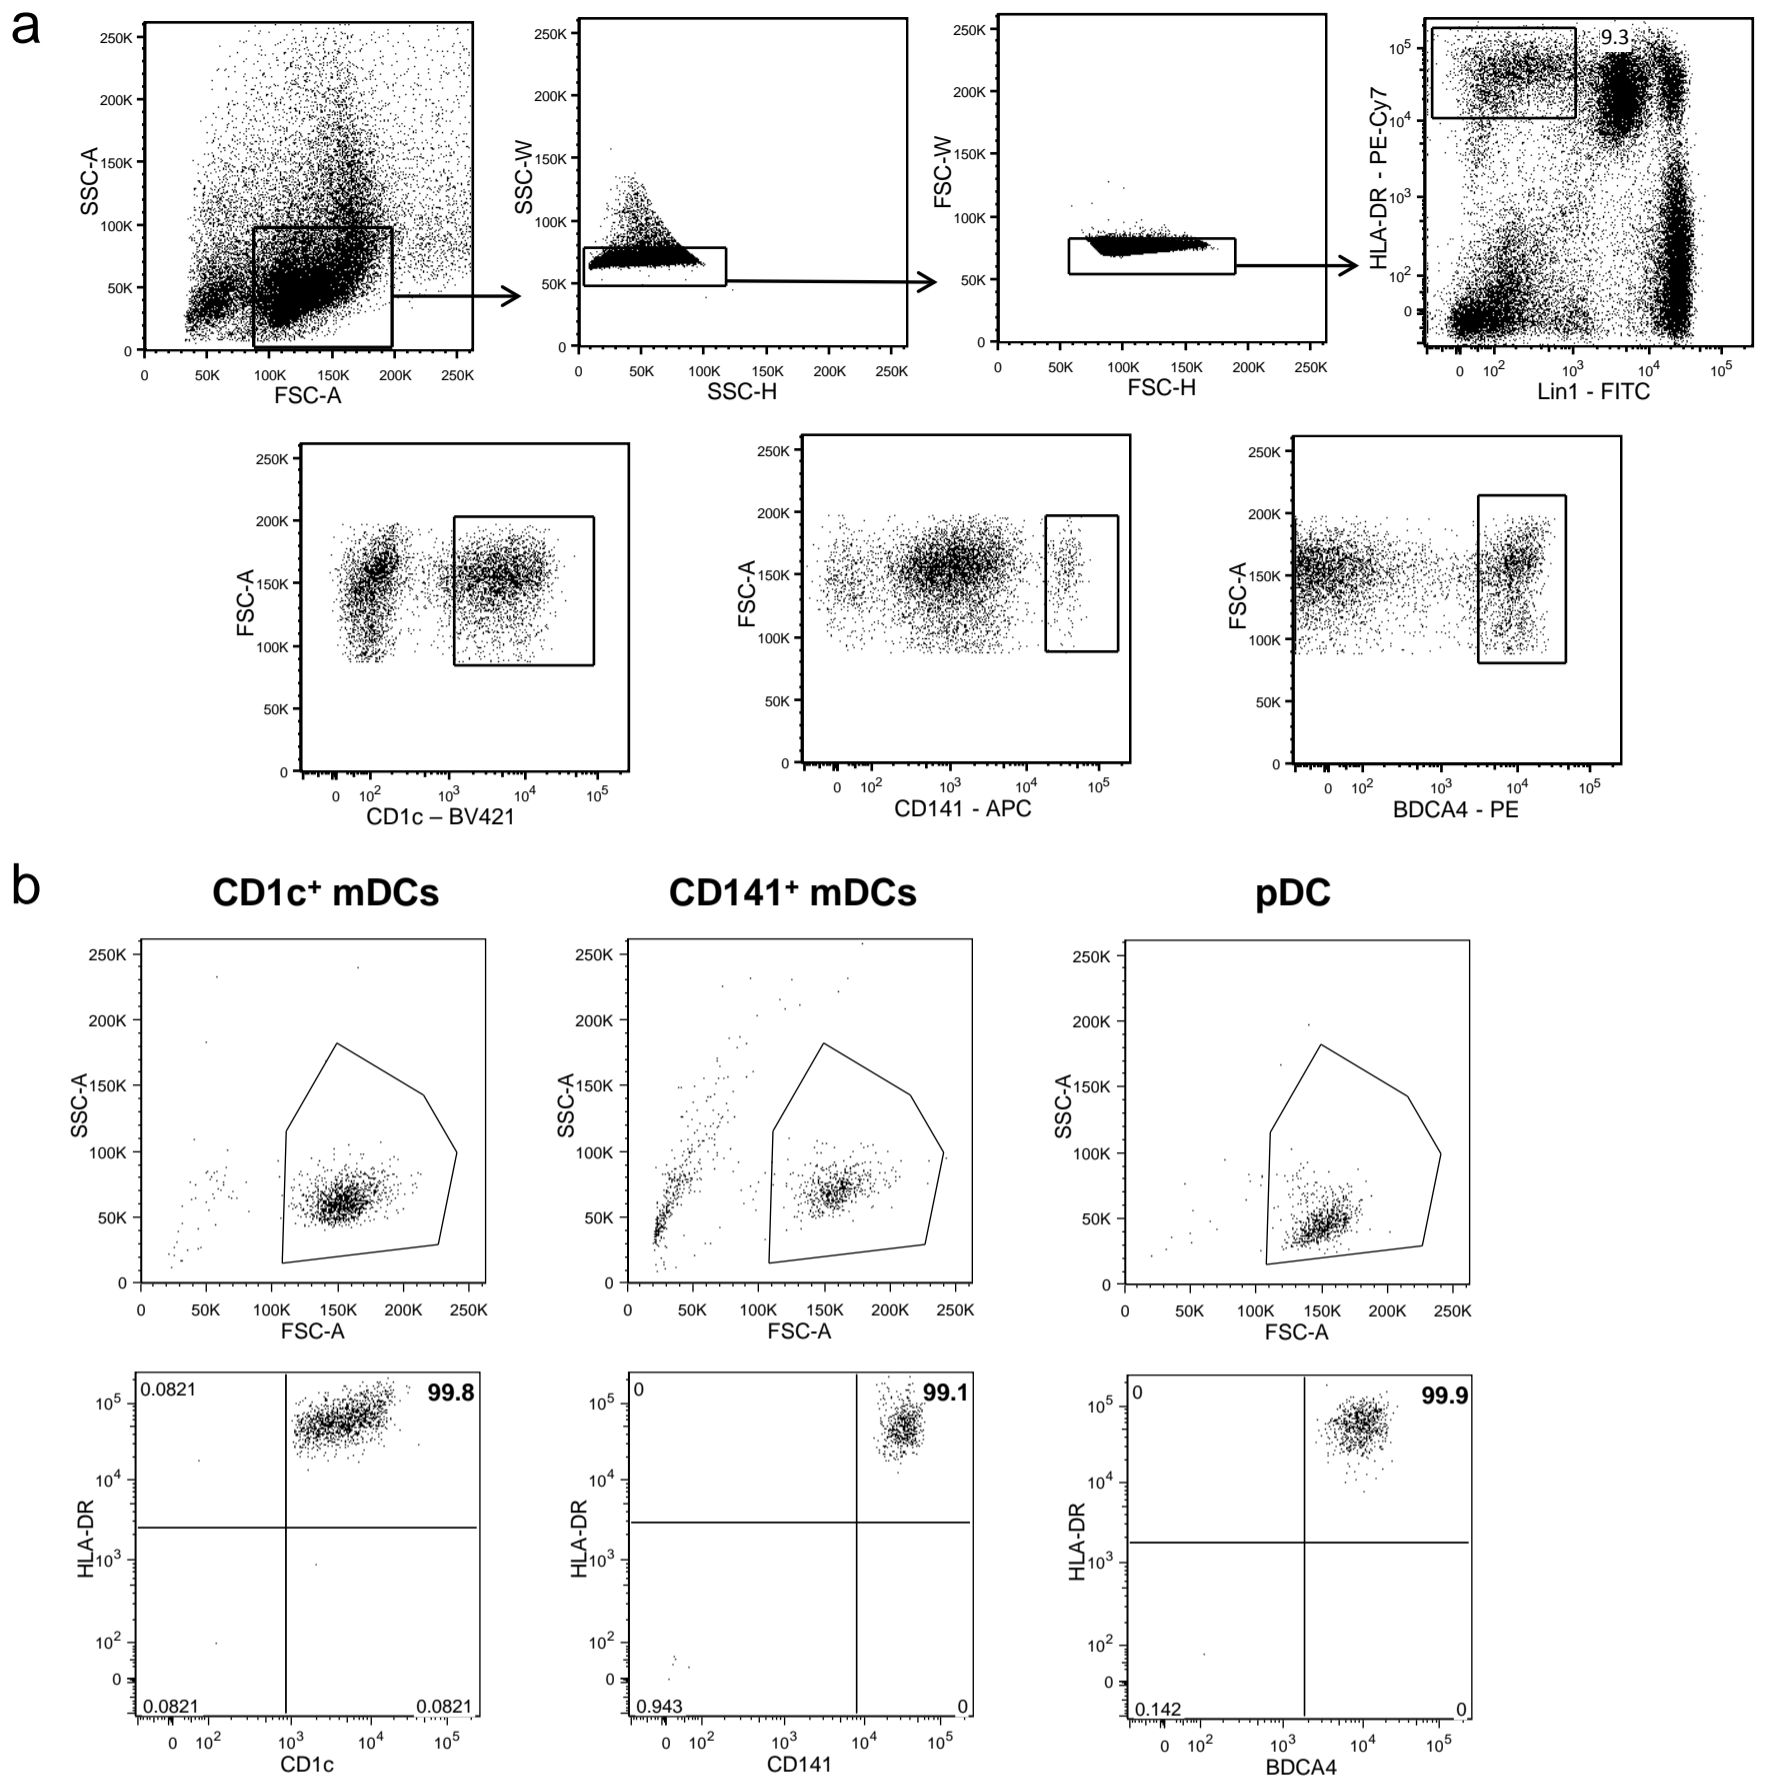

**Supplementary Figure 1: Gating strategy for the sorting of primary blood DC subsets and purity.** Before fluorescence-activated cell sorting (FACS), lineage (CD3, CD14, CD16, CD19, CD20, CD56) positive cells were depleted from PBMCs. The remaining cells were incubated with the antibodies recognizing lineage markers (FITC), HLA-DR (PE-C7), CD1c (BV421), CD141 (APC), and BDCA4 (PE). **(a)** The cells were sorted from lineage negative, HLA-DR<sup>+/high</sup> cells into three different populations, based on the expression of CD1c, CD141 or BDCA4 to obtain CD1c<sup>+</sup> mDCs, CD141<sup>+</sup> mDCs or pDCs, respectively. **(b)** Purity of isolated cells was assessed by gating on live cells and analyzing expression of HLA-DR and exclusive expression of CD1c, CD141 or BDCA4 (not shown). Shown is HLA-DR with either CD1c, CD141 or BDCA4.

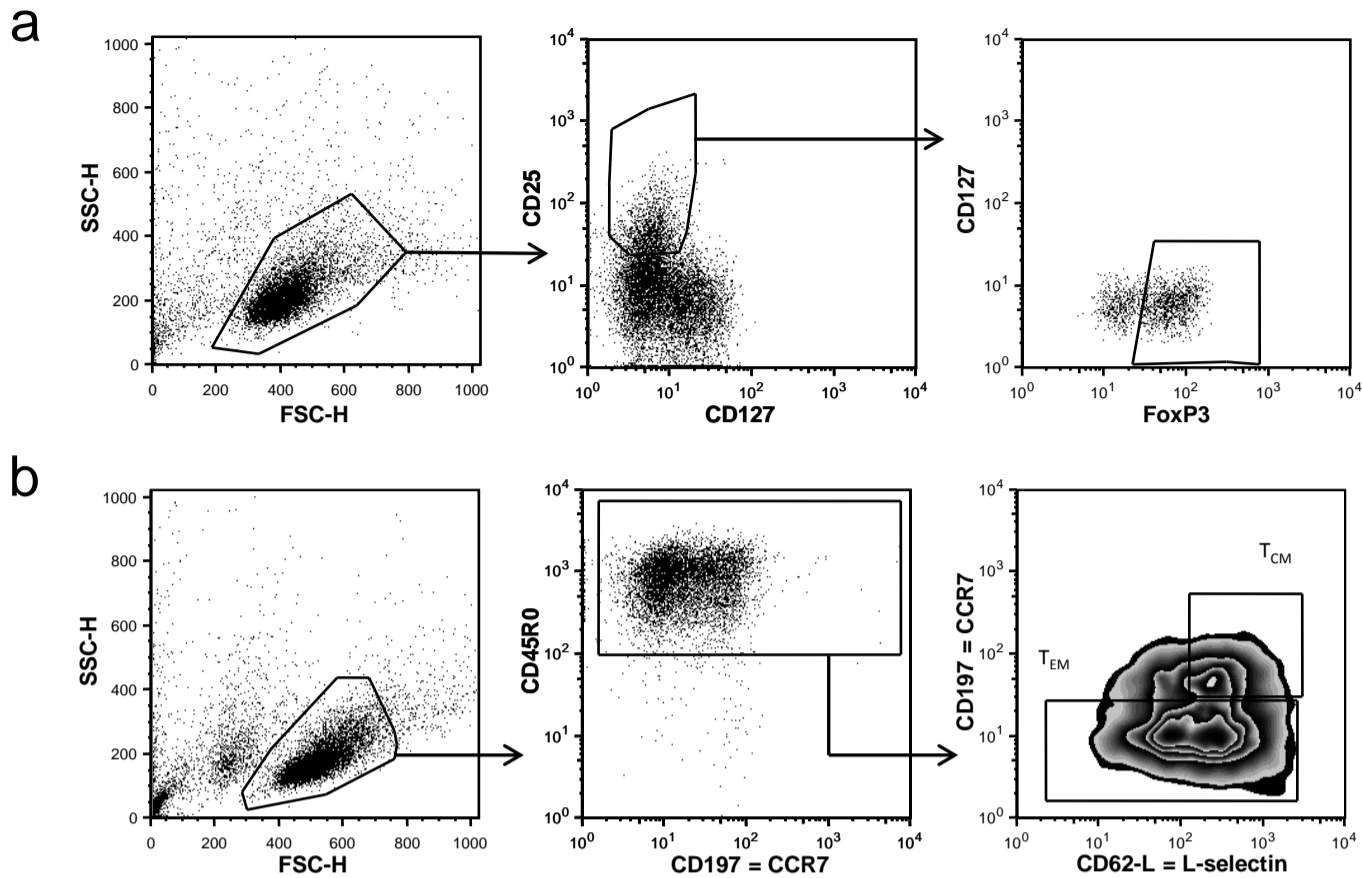

**Supplementary Figure 2: Gating strategy for regulatory T cells and effector memory phenotype.** (a) The population of regulatory T cells was determined by selecting CD25<sup>+</sup> CD127<sup>-</sup> cells and subsequently gating on the FoxP3<sup>+</sup> population. The populations are shown as percentage of live cells in figure 4a. Dead cells were excluded on the basis of the forward-sideward scatter. (b) Central and effector memory T cells were determined on the basis of surface staining of CD45RO (APC), CD197 (CCR7) (+ A488-conjugated secondary Ab) and CD62-L (L-selectin) (+ PE-conjugated secondary Ab). From CD45RO<sup>+</sup> cells, central memory T cells (T<sub>CM</sub>) were determined by further gating on CCR7<sup>+</sup>/L-selectin<sup>+</sup> and effector memory T cells (T<sub>EM</sub>) were determined by further gating on CCR7<sup>-</sup> cells; both populations are shown as percentage of live cells in supplementary figure 3.

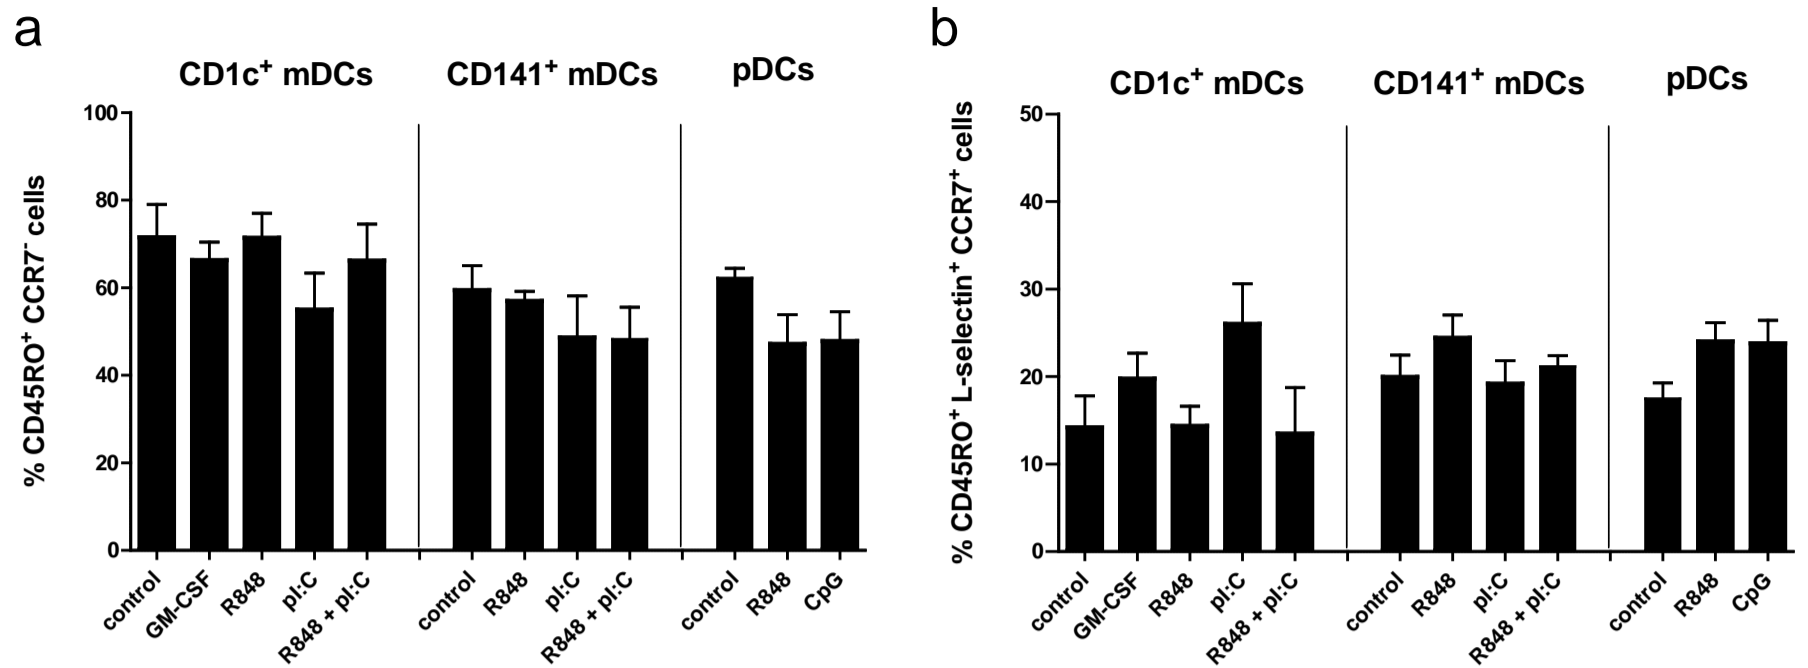

**Supplementary Figure 3: Human DC subsets induce an effector memory phenotype in naive CD4<sup>+</sup> T cells**  
 Human blood DCs were incubated with the indicated stimuli. The next day, allogeneic naive CD4<sup>+</sup> T cells were added to the DCs together with a low concentration of the superantigen SEB (10 pg/ml) and cultured until resting (11-13 days). The memory phenotype (n=5) was investigated using flow cytometry. The bar graphs show the mean percentage  $\pm$  SEM of effector (a) and central (b) memory CD4<sup>+</sup> T cells gated from live cells (TEM: CD45RO<sup>+</sup> CCR7<sup>-</sup> and TCM: CD45RO<sup>+</sup> CCR7<sup>+</sup> L-selectin<sup>+</sup>). Significance was determined by Kruskal-Wallis test followed by Dunns testing comparing the different conditions of the same subset.

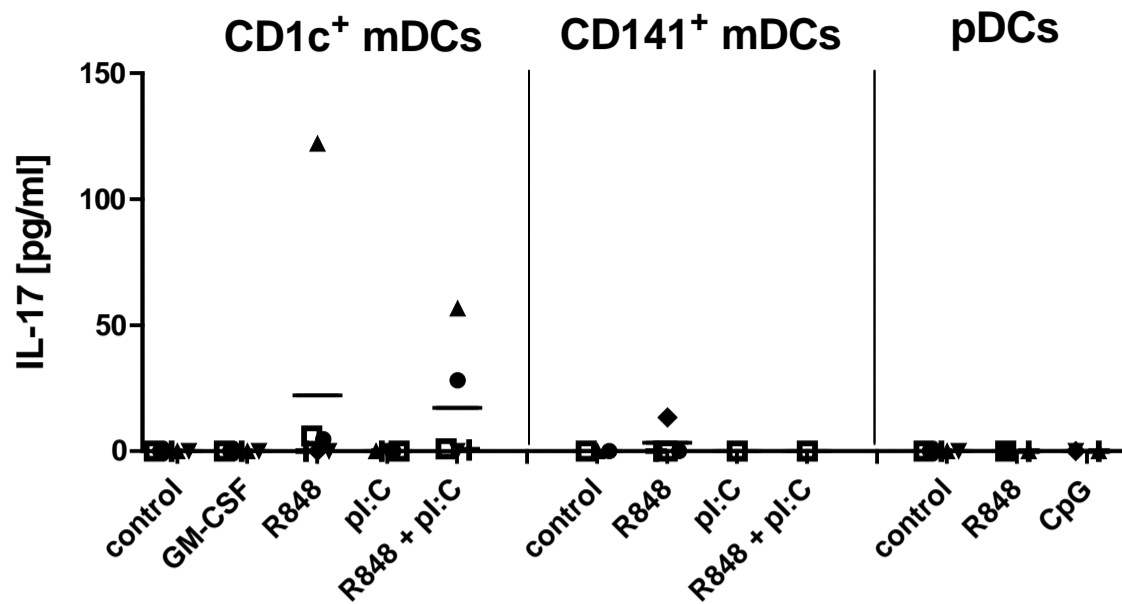

**Supplementary Figure 4: IL-17 production of re-stimulated CD4<sup>+</sup> T cells after co-culture with the DCs**  
 Human blood DCs were incubated with the indicated stimuli. The next day, allogeneic naive CD4<sup>+</sup> T cells were added to the DCs together with a low concentration of the superantigen SEB (10 pg/ml) and cultured until resting (11-13 days). These CD4<sup>+</sup> T cells were re-stimulated for 24 hrs with anti-CD3/CD28-beads. Supernatants were analyzed for IL-17 by sandwich ELISA (n=6 for CD1c<sup>+</sup> mDCs and pDCs; n=1-4 for CD141<sup>+</sup> mDCs). The graph shows mean cytokine production. Each symbol represents one donor (also across the subsets).
